# Supplementary material for: Reduced LIMK2 expression in colorectal cancer reflects its role in limiting stem cell proliferation
Source: HighWire-hosted journal article supplement (doi:10.1136/gutjnl-2012-303883), 2013-04-12
Supplement: gutjnl-2012-303883supp_tables.pdf [file gutjnl-2012-303883supp_tables.pdf]

## Supplemental Tables

**Supplemental Table 1. Clinico-pathological characteristics of the patients and their tumours included in the colorectal cancer tissue microarray**

|                               | Percent<br>(number) | Relationship with survival                                                                                                                    |
|-------------------------------|---------------------|-----------------------------------------------------------------------------------------------------------------------------------------------|
| Sex                           |                     |                                                                                                                                               |
| Male                          | 52% (340)           | $\chi^2=0.049$ ; $p=0.825$                                                                                                                    |
| Female                        | 48% (310)           |                                                                                                                                               |
| Age (mean:range)              | (69:24-94)          |                                                                                                                                               |
| < 70                          | 47% (305)           | $\chi^2=21.99$ ; $p<0.001$                                                                                                                    |
| ≥ 70                          | 53% (345)           |                                                                                                                                               |
| Tumor site*                   |                     |                                                                                                                                               |
| Proximal                      | 40% (261)           | proximal v distal, $\chi^2=8.723$ ; $p=0.003$<br>proximal v rectum, $\chi^2=2.089$ ; $p=0.148$<br>distal v rectum, $\chi^2=0.976$ ; $p=0.323$ |
| Distal                        | 38% (245)           |                                                                                                                                               |
| Rectum                        | 22% (144)           |                                                                                                                                               |
| Tumor differentiation         |                     |                                                                                                                                               |
| Well/Moderate                 | 92% (600)           | $\chi^2=2.259$ ; $p=0.133$                                                                                                                    |
| Poor                          | 8% (50)             |                                                                                                                                               |
| Extra-mural vascular invasion |                     |                                                                                                                                               |
| Present                       | 16.6% (93)          | $\chi^2=93.26$ ; $p<0.001$                                                                                                                    |
| Absent                        | 83.4% (468)         |                                                                                                                                               |
| pT stage                      |                     |                                                                                                                                               |
| T1                            | 4.6 % (30)          | T1 v T2, $\chi^2=1.217$ ; $p=0.270$<br>T2 v T3, $\chi^2=26.908$ ; $p<0.001$<br>T3 v T4, $\chi^2=34.144$ ; $p<0.001$                           |
| T2                            | 17.5% (114)         |                                                                                                                                               |
| T3                            | 63.2% (411)         |                                                                                                                                               |
| T4                            | 14.6% (95)          |                                                                                                                                               |
| pN stage                      |                     |                                                                                                                                               |
| N0                            | 56.2% (365)         | N0 v N1, $\chi^2=68.273$ ; $p<0.001$<br>N1 v N2, $\chi^2=13.257$ ; $p<0.001$                                                                  |
| N1                            | 27.1% (176)         |                                                                                                                                               |
| N2                            | 16.8% (109)         |                                                                                                                                               |
| Stage (AJCC stage)            |                     |                                                                                                                                               |
| Stage 1                       | 18.5% (120)         | stage 1 v stage 2, $\chi^2=6.503$ ; $p=0.011$<br>stage 2 v stage 3, $\chi^2=70.647$ ; $p<0.001$                                               |
| Stage 2                       | 37.7% (245)         |                                                                                                                                               |
| Stage 3                       | 43.8% (285)         |                                                                                                                                               |
| Stage                         |                     |                                                                                                                                               |
| Dukes A                       | 18.5% (120)         | Dukes A v Dukes B, $\chi^2=6.503$ ; $p=0.011$<br>Dukes B v Dukes C, $\chi^2=70.647$ ; $p<0.001$                                               |
| Dukes B                       | 37.7% (245)         |                                                                                                                                               |
| Dukes C                       | 43.8% (285)         |                                                                                                                                               |

\*Proximal colon tumors arose proximal to the splenic flexure (i.e. cecum, ascending colon, transverse colon) while distal colon tumors arose distal to this point (i.e. splenic flexure, descending colon and sigmoid colon).

**Supplemental Table 2. Dunn’s multiple comparison results for statistical significant differences in ranked LIMK2 staining**

|         | Dukes A | Dukes B | Dukes C | Lymph Node |
|---------|---------|---------|---------|------------|
| Normal  | p<0.05  | p<0.001 | p<0.001 | p<0.001    |
| Dukes A |         | p<0.001 | p<0.001 | p<0.001    |
| Dukes B |         |         | p<0.01  | p<0.01     |
| Dukes C |         |         |         | NS         |

NS = not significant

**Supplemental Table 3. Estimated mean and median survival times for low and high LIMK2 expressing patients**

| LIMK2 Staining Rank | Total N | N of events | Censored |         | Estimated Mean Survival (months) | Estimated Median Survival (months) |
|---------------------|---------|-------------|----------|---------|----------------------------------|------------------------------------|
|                     |         |             | N        | Percent |                                  |                                    |
| Low (1-3)           | 298     | 145         | 153      | 51.3%   | 93.9                             | 72.0                               |
| High (4-6)          | 323     | 110         | 213      | 65.9%   | 118.2                            | 156.0                              |
| Overall             | 621     | 255         | 366      | 58.9%   | 108.1                            | 93.0                               |

**Supplemental Table 4. Estimated mean and median survival times for each patient LIMK2 stain ranking.**

| LIMK2 Staining Rank | Total N | N of events | Censored |         | Estimated Mean Survival (months) | Estimated Median Survival (months) |
|---------------------|---------|-------------|----------|---------|----------------------------------|------------------------------------|
|                     |         |             | N        | Percent |                                  |                                    |
| 1                   | 38      | 20          | 18       | 47.4%   | 74.9                             | 70.0                               |
| 2                   | 133     | 70          | 63       | 47.4%   | 87.5                             | 62.0                               |
| 3                   | 127     | 55          | 72       | 56.7%   | 102.6                            | 83.0                               |
| 4                   | 171     | 66          | 105      | 61.4%   | 109.9                            | 113.0                              |
| 5                   | 128     | 40          | 88       | 68.8%   | 115.2                            | -                                  |
| 6                   | 24      | 4           | 20       | 83.3%   | 142.7                            | -                                  |
| <b>Overall</b>      | 621     | 255         | 366      | 58.9%   | 108.1                            | 93                                 |

**Supplemental Table 5. Dunn's multiple comparison results for statistical significant differences in ranked pCFL staining**

|         | Dukes A | Dukes B | Dukes C | Lymph Node |
|---------|---------|---------|---------|------------|
| Normal  | p<0.001 | p<0.001 | p<0.001 | p<0.001    |
| Dukes A |         | NS      | p<0.001 | p<0.001    |
| Dukes B |         |         | p<0.01  | p<0.01     |
| Dukes C |         |         |         | NS         |

NS = not significant

**Supplemental Table 6. Estimated mean and median survival times for low and high pCFL expressing patients**

| pCFL Staining Rank | Total N | N of events | Censored |         | Estimated Mean Survival (months) | Estimated Median Survival (months) |
|--------------------|---------|-------------|----------|---------|----------------------------------|------------------------------------|
|                    |         |             | N        | Percent |                                  |                                    |
| <b>Low (1-3)</b>   | 299     | 150         | 159      | 49.8%   | 91.2                             | 72.0                               |
| <b>High (4-6)</b>  | 282     | 95          | 187      | 66.3%   | 119.3                            | 115.0                              |
| <b>Overall</b>     | 581     | 245         | 336      | 57.8%   | 106.4                            | 84.0                               |

**Supplemental Table 7. Estimated mean and median survival times for each patient pCFL stain ranking.**

| pCFL Staining Rank | Total N | N of events | Censored |         | Estimated Mean Survival (months) | Estimated Median Survival (months) |
|--------------------|---------|-------------|----------|---------|----------------------------------|------------------------------------|
|                    |         |             | N        | Percent |                                  |                                    |
| <b>1</b>           | 60      | 33          | 27       | 44.0%   | 86.5                             | 64.0                               |
| <b>2</b>           | 142     | 71          | 71       | 50.0%   | 88.1                             | 75.0                               |
| <b>3</b>           | 97      | 46          | 51       | 52.6%   | 84.7                             | 67.0                               |
| <b>4</b>           | 141     | 55          | 86       | 61.0%   | 99.3                             | 107.0                              |
| <b>5</b>           | 83      | 26          | 57       | 68.7%   | 123.5                            | 113.0                              |
| <b>6</b>           | 2458    | 14          | 44       | 75.9%   | 140.8                            | -                                  |
| <b>Overall</b>     | 581     | 255         | 336      | 57.8%   | 106.4                            | 84                                 |

**Supplemental Table 8. Estimated mean and median survival times for combinations of High and Low LIMK2 and pCFL stain ranking.**

| pCFL    | LIMK2   | Total N | N of events | Censored |         | Estimated Mean Survival Time | Estimated Median Survival Time |
|---------|---------|---------|-------------|----------|---------|------------------------------|--------------------------------|
|         |         |         |             | N        | Percent |                              |                                |
| Low     | Low     | 207     | 112         | 95       | 45.9%   | 84.6                         | 63.0                           |
|         | High    | 86      | 33          | 53       | 61.6%   | 102.4                        | 124.0                          |
|         | Overall | 293     | 145         | 148      | 50.5%   | 92.4                         | 75.0                           |
| High    | Low     | 58      | 22          | 36       | 62.1%   | 107.3                        | 84.0                           |
|         | High    | 222     | 73          | 149      | 67.1%   | 118.9                        | 115.0                          |
|         | Overall | 280     | 95          | 185      | 66.1%   | 119.0                        | 115.0                          |
| Overall |         | 573     | 240         | 333      | 58.1%   | 107.0                        | 88.0                           |
